# Supplementary material for: Antenatal care booking within the first trimester of pregnancy and its associated factors among pregnant women residing in an urban area: a cross-sectional study in Debre Berhan town, Ethiopia
Source: PubMed Central journal article supplement — BMJ Open. 2020 Jun 22;10(6):e032960. doi: 10.1136/bmjopen-2019-032960 (PMC7311019; doi:10.1136/bmjopen-2019-032960), 2020-06-22
Supplement: bmjopen-2019-032960supp001.pdf [file bmjopen-2019-032960supp001.pdf]

## Annex I. Information sheet and Informed consent statements

### Information sheet

Introduction: Hello! Sir/Madam my name is \_\_\_\_\_ and I came from \_\_\_\_\_. We are conducting a study on ‘Antenatal care booking within the first trimester of pregnancy and its associated factors among pregnant women residing in urban area: A cross-sectional study in Debre Berhan town, Ethiopia. The results of this study will be helpful to improve positive pregnancy outcomes.

### Consent statements (to be read by data collector for the study participants)

I am going to ask you questions about antenatal care booking within the first trimester of pregnancy and its associated factors. You are randomly selected to participate in the study. Your participation in this study doesn’t involve any direct risk or benefit for you but is very useful to improve the positive pregnancy outcomes in this area. Your name will not be appearing on this questionnaire, and all the information you provide me will be strictly confidential. It takes 30 minutes to finish the interview and you are not obliged to answer any question you don’t wish to answer, and you can also end this interview at any time if you wish to do so. Would you like to participate in the study?

Yes \_\_\_\_\_ No \_\_\_\_\_

Interviewer, if the answer is “Yes” please let the participant sign (i.e. either using their signature or fingerprint) below to certify her verbal consent to take part voluntarily in the study. Otherwise, thank the client, conclude the conversation and file the questionnaire.

Signature \_\_\_\_\_

Date \_\_\_\_\_

Identification No. \_\_\_\_\_

Contact address of principal investigator: - mobile: +251910181381  
[email:tufabest@gmail.com](mailto:tufabest@gmail.com)

## Annex 1. Questionnaires in English

| 1. Socio-demographic characteristics |                                                                          |                                                                                   |                                                          |
|--------------------------------------|--------------------------------------------------------------------------|-----------------------------------------------------------------------------------|----------------------------------------------------------|
|                                      | Questions                                                                | Response                                                                          | Skip                                                     |
| 1.                                   | Age in years                                                             | -----years                                                                        |                                                          |
| 2.                                   | Your religion                                                            | 1. Orthodox<br>2. Muslim<br>3. Catholic<br>4. Protestant<br>5. Other specify----- |                                                          |
| 3.                                   | Place of residence                                                       | 1. Rural      2. Urban                                                            |                                                          |
| 4.                                   | Family size in number                                                    | -----                                                                             |                                                          |
| 5.                                   | Can you read and write?                                                  | 1. Yes      2. No                                                                 | If 'No' go to Q7                                         |
| 6.                                   | If your response to question 6 is 'yes', what is your educational level? | 1. Informal<br>2. Formal (-----grade)                                             |                                                          |
| 7.                                   | Your occupation                                                          | 1. Self-employed<br>2. Government employed<br>3. Other specify-----               |                                                          |
| 8.                                   | Your marital status                                                      | 1. Single<br>2. Married<br>3. Divorced<br>4. Widowed                              | If the response is married go to Q9-11 otherwise got Q12 |
| 9.                                   | Can your husband read and write?                                         | 1. Yes      2. No                                                                 |                                                          |
| 10.                                  | If your response to question 9 is 'yes', what is his educational level?  | 1. Informal<br>2. Formal (-----grade)                                             |                                                          |
| 11.                                  | Your husband occupation                                                  | 1. Self-employed<br>2. Government employed<br>3. Other specify-----               |                                                          |
| 12.                                  | Average monthly income in Ethiopian Birr                                 | -----birr                                                                         |                                                          |
| <b>2. Reproductive history</b>       |                                                                          |                                                                                   |                                                          |

|     | Question                                                                                               | Response                                                                                                                                            | Skip              |
|-----|--------------------------------------------------------------------------------------------------------|-----------------------------------------------------------------------------------------------------------------------------------------------------|-------------------|
| 13. | Your age at marriage (if ever married)                                                                 | -----years                                                                                                                                          |                   |
| 14. | Your age at first childbirth                                                                           | -----years                                                                                                                                          |                   |
| 15. | Gravidity                                                                                              | -----                                                                                                                                               |                   |
| 16. | Parity                                                                                                 | -----                                                                                                                                               |                   |
| 17. | Have you ever experienced stillbirth?                                                                  | 1. Yes 2. No                                                                                                                                        | If 'No' go to Q19 |
| 18. | If 'yes' to question 17, how many times?                                                               | -----times                                                                                                                                          |                   |
| 19. | Have you ever experienced abortion                                                                     | 1. Yes 2. No                                                                                                                                        |                   |
| 20. | Where did you give the first birth (if any)                                                            | 1. Home<br>2. Hospital<br>3. Health center<br>4. Other specify -----                                                                                |                   |
| 21. | Mode of delivery for your first baby                                                                   | 1. Caesarean section<br>2. Vaginal delivery<br>3. Instrumental delivery                                                                             |                   |
| 22. | History of previous ANC follow up                                                                      | 1. Yes 2. No                                                                                                                                        | If 'No' go to Q25 |
| 23. | During your previous ANC follow up, did you receive advice on danger signs during pregnancy?           | 1. Yes 2. No                                                                                                                                        | If 'No' go to 25  |
| 24. | If 'yes' to question 23 on which danger sign did you receive advice? (multiple responses are possible) | 1. Persistent vomiting<br>2. Vaginal bleeding<br>3. Severe headache<br>4. Face and hand swelling<br>5. Blurring of vision<br>6. Other specify _____ |                   |
| 25. | Is the current pregnancy planned?                                                                      | 1. Yes 2. No                                                                                                                                        |                   |
| 26. | When have you been recognized the current pregnancy?                                                   | -----weeks                                                                                                                                          |                   |
| 27. | Age of current pregnancy                                                                               | -----weeks                                                                                                                                          |                   |
| 28. | How did you recognize the current pregnancy?                                                           | 1. Missed period<br>2. Urine test                                                                                                                   |                   |

|                                                 |                                                                                                       |                                                                                                                                                                                                                                                                                                   |                              |
|-------------------------------------------------|-------------------------------------------------------------------------------------------------------|---------------------------------------------------------------------------------------------------------------------------------------------------------------------------------------------------------------------------------------------------------------------------------------------------|------------------------------|
| 29.                                             | When do you think the right time to begin ANC booking?                                                | -----weeks                                                                                                                                                                                                                                                                                        | If within 12 weeks go to Q31 |
| 30.                                             | What was/ were the reasons for the late ANC booking (after 12 weeks)? (multiple answers are possible) | <ol style="list-style-type: none"> <li>1. Lack of information on right time of ANC booking</li> <li>2. Observing danger signs</li> <li>3. Lack of decision making power</li> <li>4. Unwanted pregnancy</li> <li>5. Other specify -----</li> </ol>                                                 |                              |
| 31.                                             | Reason for the first visit during the current pregnancy?                                              | <ol style="list-style-type: none"> <li>1. I was sick (pregnancy related ill-health)</li> <li>2. To start ANC follow up</li> <li>3. Advised by the health workers</li> <li>4. Advised by the family</li> <li>5. Other specify-----</li> </ol>                                                      |                              |
| 32.                                             | What is the gestational age of current pregnancy when you start ANC ?                                 | -----weeks                                                                                                                                                                                                                                                                                        |                              |
| <b>3. Knowledge of pregnant women about ANC</b> |                                                                                                       |                                                                                                                                                                                                                                                                                                   |                              |
|                                                 | <b>Question</b>                                                                                       | <b>Response</b>                                                                                                                                                                                                                                                                                   | <b>Skip</b>                  |
| 33.                                             | Do you know ANC services provided for pregnant women?                                                 | 1. Yes 2. No                                                                                                                                                                                                                                                                                      | If 'No' end                  |
| 34.                                             | If 'yes' to question 33 which services do you know? (multiple answers are possible)                   | <ol style="list-style-type: none"> <li>1. Tetanus toxoid vaccination</li> <li>2. Supplement (iron)</li> <li>3. Albendazole</li> <li>4. Blood pressure</li> <li>5. HIV and STI</li> <li>6. Weight</li> <li>7. Fetal heartbeat</li> <li>8. Advice service</li> <li>9. Other specify-----</li> </ol> |                              |
| 35.                                             | Is ANC service decreases maternal mortality?                                                          | 1. Yes 2. No                                                                                                                                                                                                                                                                                      |                              |
| 36.                                             | What is the right gestational age of first ANC booking ?                                              | _____weeks                                                                                                                                                                                                                                                                                        |                              |

|     |                                                                            |                 |  |
|-----|----------------------------------------------------------------------------|-----------------|--|
| 37. | Do you know the frequency of ANC visits for low-risk pregnant women?       | 1. Yes<br>2. No |  |
| 38. | What is the frequency of ANC visit for high risk pregnant women in number? | _____           |  |

**Thank you for your time**
